## Adrenergic signaling controls early transcriptional programs during CD8<sup>+</sup> T cell responses to viral infection

Leonardo D. Estrada<sup>1</sup>, Didem Ağaç Çobanoğlu<sup>1,4</sup>, Aaron Wise<sup>2</sup>, Robert W. Maples<sup>1</sup>, Murat Can Çobanoğlu<sup>3</sup>, and J. David Farrar<sup>1\*</sup>

<sup>1</sup>Department of Immunology, UT Southwestern Medical Center, Dallas, TX.

<sup>2</sup>Encodia Inc., San Diego, CA.

<sup>3</sup>Department of Bioinformatics, UT Southwestern Medical Center, Dallas, TX.

<sup>4</sup>Present affiliation: Department of Immunology, UT M.D. Anderson Cancer Center, Houston, TX.

\*Correspondence to: J. David Farrar, Department of Immunology, UT Southwestern Medical Center, 5323 Harry Hines Blvd., Dallas, TX 75390-9093. Email:

[david.farrar@utsouthwestern.edu](mailto:david.farrar@utsouthwestern.edu)

Keywords: CD8<sup>+</sup> T cell, adrenergic receptor, virus, transcriptome

## Abstract

20 Viral infections drive the expansion and differentiation of responding CD8<sup>+</sup> T cells into  
variegated populations of cytolytic effector and memory cells. While pro-inflammatory  
22 cytokines and cell surface immune receptors play a key role in guiding T cell responses to  
infection, T cells are also markedly influenced by neurotransmitters. Norepinephrine is a key  
24 sympathetic neurotransmitter, which acts to suppress CD8<sup>+</sup> T cell cytokine secretion and lytic  
activity by signaling through the  $\beta$ 2-adrenergic receptor (ADRB2). Although ADRB2 signaling  
26 is considered generally immunosuppressive, its role in regulating differentiation of effector T  
cells in response to infection has not been investigated. Using an adoptive transfer approach, we  
28 compared the expansion and differentiation of wild type (WT) to *Adrb2*<sup>-/-</sup> CD8<sup>+</sup> T cells  
throughout the primary response to vesicular stomatitis virus (VSV) infection *in vivo*. We  
30 measured the dynamic changes in transcriptome profiles of antigen-specific CD8<sup>+</sup> T cells as  
they responded to VSV. Within the first 7 days of infection, WT cells out-paced the expansion of  
32 *Adrb2*<sup>-/-</sup> cells, which correlated with reduced expression of IL-2 and the IL-2R $\alpha$  in the absence of  
ADRB2. RNASeq analysis identified over 300 differentially expressed genes that were both  
34 temporally regulated following infection and selectively regulated in WT vs *Adrb2*<sup>-/-</sup> cells. These  
genes contributed to major transcriptional pathways including cytokine receptor activation,  
36 signaling in cancer, immune deficiency, and neurotransmitter pathways. By parsing genes within  
groups that were either induced or repressed over time in response to infection, we identified  
38 three main branches of genes that were differentially regulated by the ADRB2. These gene sets  
were predicted to be regulated by specific transcription factors involved in effector T cell  
40 development, such as *Tbx21* and *Eomes*. Collectively, these data demonstrate a significant role  
for ADRB2 signaling in regulating key transcriptional pathways during CD8<sup>+</sup> T cells responses  
42 to infection that may dramatically impact their functional capabilities and downstream memory  
cell development.

44

46

## Introduction

48 Cytolytic CD8<sup>+</sup> T cells play a critical role in immune responses to pathogens and can be  
harnessed to target cancer. Their activation and development into effector cells are guided by a  
50 variety of signals that include antigen recognition, co-stimulatory receptor activation, and soluble  
factors such as cytokines. Upon antigen recognition, CD8<sup>+</sup> T cells rapidly divide and acquire  
52 critical effector functions including cytokine secretion and lytic activity that are essential for  
pathogen clearance. Once the infection resolves, most cells die through attrition leaving a small  
54 pool of diverse memory cells with the capacity for rapid expansion and effector function in the  
face of a secondary infection. Many cells of the immune system, including CD8<sup>+</sup> T cells, express  
56 various neurotransmitter receptors (1, 2), yet the role of neural signals in T cell function remains  
largely unexplored. As secondary lymphoid tissues are heavily innervated by post-ganglionic  
58 sympathetic neurons that secrete norepinephrine (NE), the sympathetic nervous system would be  
expected to play a pivotal role in immune regulation (2-4).

60 In previous studies, depletion of endogenous NE through chemical sympathectomy  
significantly enhanced the innate cytokine storm leading to exacerbated pathology during  
62 influenza infection of mice (5). This hyper-inflammation was accompanied by significantly  
increased IFN- $\gamma$ -producing CD8<sup>+</sup> T cells during the primary infection phase, indicating an  
64 important role for NE in limiting the magnitude of both innate and adaptive T cell responses to  
viral infections. More recent studies have demonstrated an intrinsic role for NE signaling to  
66 suppress cytokine secretion and lytic activity in both mouse and human CD8<sup>+</sup> T cells (6-8). NE  
acted specifically and exclusively through the ADRB2 to modulate acute effector function. Thus,  
68 ADRB2 signaling plays a distinct role in limiting the magnitude of T cell-mediated primary  
responses.

70 Initial T cell activation pathways, such as antigen recognition and cytokine signaling, are  
critical to antiviral responses. We wished to understand how ADRB2 signaling impacted these  
72 early primary transcriptional responses of T cells to an *in vivo* virus infection. In this study, we  
assessed and compared detailed transcriptome changes of wild type (WT) and *Adrb2*-deficient  
74 (*Adrb2*<sup>-/-</sup>) CD8<sup>+</sup> T cells throughout their responses to a viral infection and utilized novel  
bioinformatic tools to define regulatory elements controlled by adrenergic signaling. We found  
76 that intrinsic ADRB2 signaling in CD8<sup>+</sup> T cells controls early transcriptional programs at all

timepoints through the first 12 days of their response to Vesicular Stomatitis Virus (VSV)  
78 infection. Many of these dysregulated pathways belonged to known regulators of T cell function  
and development including cytokine signaling and response to pathogens. This study highlights a  
80 critical role for ADRB2 signaling in regulating dynamic transcriptome expression throughout  
CD8<sup>+</sup> T cell antiviral responses.

## 82 Results

To gain a better understanding of how ADRB2 signaling modulates peripheral CD8<sup>+</sup> T cell  
84 development, we compared the expansion and gene expression changes that occurred in response  
to a virus challenge between WT and *Adrb2*<sup>-/-</sup> CD8<sup>+</sup> T cells. We utilized the clone4 T cell receptor  
86 transgenic (C4-Tg) model, which is specific for the influenza hemagglutinin antigen (HA)  
presented by H-2K<sup>d</sup> on the BALB/c background (9). We measured antigen-specific T cell  
88 responses to a recombinant VSV expressing HA protein from influenza (VSV-HA) (10). In order  
to distinguish the responses, congenic WT (CD90.1/1) and *Adrb2*<sup>-/-</sup> (CD90.1/2) C4-Tg T cells were  
90 adoptively co-transferred into BALB/c recipients (CD90.2/2), which then were infected with VSV-  
HA (Fig. 1A). Primary expansion was monitored in spleen and lymph nodes by staining for both  
92 CD90.1 and CD90.2 congenic markers that distinguished the transferred from the endogenous pool  
of CD8<sup>+</sup> T cells as well as WT from *Adrb2*<sup>-/-</sup> cells (Fig. 1B). WT and *Adrb2*<sup>-/-</sup> cells expanded  
94 equally to day 5 following infection. However, we observed a significant reduction in *Adrb2*<sup>-/-</sup>  
CD8<sup>+</sup> T cells at days 7 and 12 post-infection, compared to WT, which correlated with reduced  
96 expression of the high-affinity IL-2R $\alpha$  (CD25) on day 5 and lower IL-2 secretion from *in vitro*-  
stimulated cells (Supplemental Figs. 1A and B). Although we previously found no marked  
98 differences in either proliferation or apoptosis in response to antigen stimulation (11), we found  
that *Adrb2*<sup>-/-</sup> cells displayed reduced induction of CD25 as a function of TCR-stimulated cell  
100 division *in vitro*, and supplementation of cultures with IL-2 restored CD25 expression in *Adrb2*<sup>-/-</sup>  
cells (Supplemental Fig. 1C). In contrast, we found no significant differences in either *in vitro*  
102 cytokine secretion (IFN- $\gamma$  and TNF- $\alpha$ ) or lytic activity between WT and *Adrb2*<sup>-/-</sup> cells at these  
early time points of infection (data not shown). Thus, the attenuated early proliferation of *Adrb2*<sup>-/-</sup>  
104 cells correlated with their reduced IL-2 and IL-2R $\alpha$  expression, yet their cytokine secretion  
potential on a per-cell basis remained intact during their expansion into effector cells.

106 Early T cell priming events regulate long-range transcriptional programs that lead to both  
effector and memory cell development (12, 13). We measured gene expression changes in FACS-  
108 purified WT and *Adrb2*<sup>-/-</sup> cells from VSV-HA-infected animals at each time point shown in Fig.  
1B by RNASeq analysis. Over 6000 genes were collectively regulated in response to infection in  
both cell types. EdgeR analysis (14) identified over 320 genes that were differentially expressed  
110 between WT and *Adrb2*<sup>-/-</sup> cells at any of the time points, including day 0 (Supplemental Table 1).

112 A one-way hierarchical cluster of these genes demonstrated a temporal change in gene expression,  
which for some clusters of genes differed at all timepoints (Fig. 1C). The temporal dynamics of  
114 gene expression changes were highlighted by principal component (PC) analysis of this gene set,  
as genes within the first two PCs differed significantly by time, but not by genotype (Fig. 1D,  
116 upper panel). These components were driven by the expression of genes involved in the primary  
effector response such as cytokines, chemokines, and cytokine receptors. However, PCs 3 and 4  
118 displayed a marked division over time between WT and *Adrb2*<sup>-/-</sup> cells, which were comprised of  
genes involved in a variety of cellular processes including transcription, signal transduction, and  
120 cellular differentiation (Fig. 1D, lower panel). We further segregated these temporal gene sets  
based on their up or down-regulation at each time point relative to WT cells, and select genes are  
122 annotated within the volcano plots in Fig. 2A. Genes that were significantly differentially  
expressed, either positively or negatively, between WT and *Adrb2*<sup>-/-</sup> cells were then assessed for  
124 their contribution to specific KEGG pathways (Fig. 2B). We found that unique pathways were  
engaged by ADRB2 signaling at incremental times through their progression to effector cells.  
126 Among these pathways, we found that select pathways were dysregulated at multiple times  
throughout the early phase of infection, such as cytokine receptor interaction, transcriptional  
128 misregulation in cancer, and circadian rhythms. The genes driving these varied pathways are listed  
in Supplemental Table 2 and included *Stat1*, *Il2ra*, *Il10ra*, *Per2*, *Fbxl3*, and *Mef2c*. Although the  
130 sorted populations of cells were determined to be >95% pure in post sorting analyses, we observed  
low-level expression of some B cell-associated mRNAs including *Cd19* and *Btk*, which were  
132 differentially expressed in *Adrb2*<sup>-/-</sup> cells. These data suggest an important role for the ADRB2 in  
regulating the temporal expression of genes during the early stages of T cell priming.

134 As cells divide and develop over time, their gene expression patterns become highly  
variegated. These fluctuations in gene expression can be modeled in terms of the regulatory  
136 dynamics that cause them. We utilized SMARTS to model, compare, and visualize the regulatory  
dynamics following infection for WT and *Adrb2*<sup>-/-</sup> cells (Fig. 3A) (15). Using SMARTS, we  
138 constructed regulatory models for each condition using CD8<sup>+</sup>-specific transcription regulator  
(TR)-gene interaction data derived from Best et al. (16). Genes were parsed into paths based on  
140 the similarity they share in both the direction and magnitude of expression at each time point, as  
well as the TRs which are known to regulate them. A full list of genes for each path is provided  
142 in Supplemental Tables 3-4. Each SMARTS model represents sets of genes following a similar

regulatory program as paths; split nodes represent regulatory events that cause groups of genes to  
144 diverge in expression. Select TRs for each path are listed in box diagrams for each path in Fig. 3A,  
and a complete list is provided in Supplemental Tables 5-6. As expected, genes within both  
146 positively and negatively regulated paths shared regulation by select transcription factors known  
to be involved in CD8<sup>+</sup> T cell function and memory development including *Tbx21*, *Eomes*, *Irf5*,  
148 *Rxra*, *Prdm1*, *Id2*, and *Stat4*. Gene regulation by these TRs was predicted by SMARTS to be shared  
between WT and *Adrb2*<sup>-/-</sup> cells. SMARTS was also used to identify TRs that follow distinct  
150 regulatory programs in WT and *Adrb2*<sup>-/-</sup> cells (Supplemental Table 7). TRs found to be involved  
in differential gene regulation within select paths are highlighted in red in Fig. 3A. For example,  
152 *Mbd2* was predicted to selectively regulate genes in WT paths C and H, while *Mafb* was predicted  
to regulate genes within path E in *Adrb2*<sup>-/-</sup> cells but not WT cells.

154 Overall, the overall pattern of gene expression changes that occurred over time were similar  
between WT and *Adrb2*<sup>-/-</sup> cells. However, we identified a unique path consisting of genes that were  
156 more highly induced on day 4 post-infection in WT cells that were not regulated at that timepoint  
in *Adrb2*<sup>-/-</sup> cells (Fig. 3A, *Adrb2*<sup>+/+</sup> path G (magenta)). By comparing the constituent genes of paths  
158 F (cyan) and G (magenta) in WT cells with path E (green) in *Adrb2*<sup>-/-</sup> cells, the majority of genes  
in WT path G were included in the split path E in *Adrb2*<sup>-/-</sup> cells (Fig. 3B, Supplemental Table 8).  
160 Further, the genes in WT path G and *Adrb2*<sup>-/-</sup> path E mapped to many of the top KEGG pathways  
involved in T cell effector function (Fig. 3C). Despite their similar directional change, only 1/3 of  
162 genes within WT path F were shared with *Adrb2*<sup>-/-</sup> path E, which was underscored by the unique  
KEGG pathways involved in WT path F. These data suggest that the effector response genes  
164 induced at day 4 post-infection in WT cells were either temporally delayed or absent in their  
induction in *Adrb2*<sup>-/-</sup> cells.

166 Common to both paths in WT and *Adrb2*<sup>-/-</sup> cells, *Tbx21* and *Eomes* were predicted by  
SMARTS to regulate genes known to be involved in the transition from effector to memory cells,  
168 yet *Tbx21* itself was not differentially expressed at any time point between the two models (Fig.  
4A). However, *Eomes* was more highly expressed in *Adrb2*<sup>-/-</sup> than WT cells on days 7 and 12 post-  
170 infection (Fig. 4B), which may impact the effector to memory transition based on previous studies.  
Within the gene sets of WT path G and *Adrb2*<sup>-/-</sup> path E, we identified several TRs that were  
172 differentially expressed at day 4 post-infection, the time point at which the major split path  
occurred in WT but not *Adrb2*<sup>-/-</sup> cells. These factors included *Prdm1*, *Pax5*, *Spib*, *Mef2c*, *Mafb*,

174 and *Bach2* (Fig. 4C-H). Of these factors, *Pax5* and *Spib* are predominantly expressed in B cells  
and silenced in T cells (17, 18), yet their transient induction in WT CD8<sup>+</sup> T cells during infection  
176 may indicate a previously unanticipated role for them in T cell function. However, *Prdm1*, *Mef2c*,  
and *Bach2* have been shown to regulate various aspects of T cell function (16, 19, 20), specifically  
178 the effector to memory cell transition. Of note, *Prdm1* was not only more highly induced in WT  
compared to *Adrb2*<sup>-/-</sup> cells at day 4 post-infection, it was also selectively included in genes  
180 constituent to WT path G, but not in *Adrb2*<sup>-/-</sup> path E (Supplemental Table 6). Thus, the ADRB2 is  
involved in regulating the proper timing of gene expression patterns during early T cell priming,  
182 and the factors that correlated with these differences are known regulators of effector T cell  
development.

184



## Discussion

186           The sympathetic nervous system controls a broad range of behavioral and physiological  
188 processes. Given the significant innervation of secondary lymphoid tissues by sympathetic  
190 neurons, it is not surprising that this neurotransmitter pathway regulates immune function. Indeed,  
192 prior reports have shown a clear role for NE and the ADRB2 in suppressing a variety of acute  
194 immune functions (21), including acute cytokine secretion and lytic activity in CD8<sup>+</sup> T cells (5-8).  
196 In prior studies, the absence of adrenergic signaling *in vivo*, by chemical sympathectomy,  
198 increased IFN- $\gamma$  producing CD8<sup>+</sup> T cells after influenza infection (5). Consistent with these  
200 findings, we recently demonstrated that antigen-induced cytokine secretion from CD8<sup>+</sup> T cells was  
202 markedly decreased when mice were treated with a long-acting  $\beta$ 2-agonist during VSV infection  
204 (6). Although NE and ADRB2 agonists suppressed acute CD8<sup>+</sup> T cell effector function in response  
206 to antigen receptor activation, it was not clear how adrenergic signaling influenced downstream  
effector T cell development. Our previous studies found that *in vitro* priming of naive CD8<sup>+</sup> T  
cells into effector cells was not affected by NE during the differentiation stage (6). In the current  
study, we uncovered a key role for ADRB2 signaling that regulated various aspects of CD8<sup>+</sup> T  
effector cell responses to *in vivo* virus infection. First, we found that adrenergic signaling regulated  
CD25 expression and IL-2 secretion, which correlated with a reduced proportion of *Adrb2*<sup>-/-</sup> to WT  
Ag-specific cells towards the end of the expansion phase *in vivo*. As CD25 expression correlates  
with memory cell development (22-24), it is possible that the transition from effector to memory  
cell development can be impacted by ADRB2 signaling. Second, our current work demonstrated  
that intrinsic ADRB2 signaling on CD8<sup>+</sup> T cells regulates a dynamic program of gene expression  
that correlates with both their expansion and their time-dependent development into effector cells.

208           Gene expression is regulated by networks of interactions, and these networks show context-  
210 dependent adaptation (25, 26). The dynamic changes in gene expression that occurred in CD8<sup>+</sup> T  
212 cells during their expansion into effector cells was generally preserved in *Adrb2*<sup>-/-</sup> cells, as the main  
214 components of those gene clusters evolved over time in both WT and *Adrb2*<sup>-/-</sup> cells. However, by  
monitoring the dynamic changes in gene expression that occurred throughout the effector  
expansion phase with SMARTS (15), we identified clusters of genes that were significantly  
dysregulated in the absence of the *Adrb2*. Further analyses predicted unique transcription factors  
that could be responsible for the regulation of those gene clusters based on combinatorial gene

expression (27). The main branch of genes that were induced in WT cells at d4 post-infection (path  
216 G) shared most of its genes with those induced in *Adrb2*<sup>-/-</sup> cells at a later time (d5, path E). While  
most of the predicted regulators of those genes were common to both paths, some were more highly  
218 induced at d4 in WT cells, such as *Pax5* and *Mafb*. The d4 path G in WT cells was comprised of a  
variety of genes involved in major T cell fate-determining pathways, and the delay in their  
220 induction observed in *Adrb2*<sup>-/-</sup> cells may indicate a critical role for *Adrb2* signaling in the temporal  
response to infection. It is unlikely that ADRB2 signaling regulates a single factor that solely  
222 orchestrates these branch points. Nonetheless, we speculate that the *Adrb2* regulated those factors  
during T cell proliferation to provide a temporal program of gene expression corresponding to their  
224 timely response to the pathogen. These mechanisms could include signaling pathways,  
transcriptional changes, post-translational modifications, epigenetic alterations, and asymmetric  
226 inheritance of fate-determining factors during cell division (23, 28, 29).

Previous studies have demonstrated an immunosuppressive role for ADRB2 signaling,  
228 acting acutely to dampen the magnitude of cytokine expression and lytic activity in pre-committed  
effector cells (8, 30, 31). Interestingly, deletion of *Adrb2* also impacts the diurnal recirculation of  
230 T cells through secondary lymphoid tissues (32, 33), indicating a role for ADRB2 signaling in  
circadian regulation. Indeed, we identified several core circadian genes, such as *Per2* and *Fbxl3*,  
232 differentially regulated at various time points of infection, suggesting a direct role for regulating  
these clock genes intrinsically in CD8<sup>+</sup> T cells. The detailed temporal map of gene expression  
234 described here has identified a clear role for the ADRB2 in the primary response of acute CD8<sup>+</sup> T  
effector cells to viral infection. Future studies will utilize these networks to identify how these  
236 pathways functionally regulate effector and memory cell development through the course of  
infection.

238

240

## References:

- 242
1. D. M. Nance, V. M. Sanders, Autonomic innervation and regulation of the immune  
244 system (1987-2007). *Brain. Behav. Immun.* **21**, 736-745 (2007).
  2. D. Sharma, J. D. Farrar, Adrenergic regulation of immune cell function and  
246 inflammation. *Semin. Immunopathol.* **42**, 709-717 (2020).
  3. S. S. Chavan, K. J. Tracey, Essential Neuroscience in Immunology. *J. Immunol.* **198**,  
248 3389-3397 (2017).
  4. D. Agac, M. A. Gill, J. D. Farrar, Adrenergic Signaling at the Interface of Allergic  
250 Asthma and Viral Infections. *Front. Immunol.* **9**, 736 (2018).
  5. K. M. Grebe *et al.*, Sympathetic nervous system control of anti-influenza CD8+ T cell  
252 responses. *Proc Natl Acad Sci U S A* **106**, 5300-5305 (2009).
  6. L. D. Estrada, D. Agac, J. D. Farrar, Sympathetic neural signaling via the beta2-  
254 adrenergic receptor suppresses T-cell receptor-mediated human and mouse CD8(+) T-cell  
effector function. *Eur J Immunol* **46**, 1948-1958 (2016).
  7. A. Zalli *et al.*, Targeting  $\beta_2$  adrenergic receptors regulate human T cell function directly  
256 and indirectly. *Brain Behav Immun* **45**, 211-218 (2015).
  8. C. Slota, A. Shi, G. Chen, M. Bevans, N. P. Weng, Norepinephrine preferentially  
258 modulates memory CD8 T cell function inducing inflammatory cytokine production and  
260 reducing proliferation in response to activation. *Brain. Behav. Immun.* **46**, 168-179  
(2015).
  9. D. Lo *et al.*, Peripheral tolerance to an islet cell-specific hemagglutinin transgene affects  
262 both CD4+ and CD8+ T cells. *Eur. J. Immunol.* **22**, 1013-1022 (1992).
  10. B. E. Barefoot, K. Athearn, C. J. Sample, E. A. Ramsburg, Intramuscular immunization  
264 with a vesicular stomatitis virus recombinant expressing the influenza hemagglutinin  
266 provides post-exposure protection against lethal influenza challenge. *Vaccine* **28**, 79-89  
(2009).
  11. L. D. Estrada, D. Agac, J. D. Farrar, Sympathetic neural signaling via the beta2-  
268 adrenergic receptor suppresses T-cell receptor-mediated human and mouse CD8+ T-cell  
270 effector function. *Eur. J. Immunol.* 10.1002/eji.201646395 (2016).
  12. J. Arsenio *et al.*, Early specification of CD8+ T lymphocyte fates during adaptive  
272 immunity revealed by single-cell gene-expression analyses. *Nat. Immunol.* **15**, 365-372  
(2014).
  13. F. Z. Chowdhury, H. J. Ramos, L. S. Davis, J. Forman, J. D. Farrar, IL-12 selectively  
274 programs effector pathways that are stably expressed in human CD8+ effector memory T  
276 cells in vivo. *Blood* **118**, 3890-3900 (2011).
  14. M. D. Robinson, D. J. McCarthy, G. K. Smyth, edgeR: a Bioconductor package for  
278 differential expression analysis of digital gene expression data. *Bioinformatics* **26**, 139-  
140 (2010).
  15. A. Wise, Z. Bar-Joseph, SMARTS: reconstructing disease response networks from  
280 multiple individuals using time series gene expression data. *Bioinformatics* **31**, 1250-  
282 1257 (2015).
  16. J. A. Best *et al.*, Transcriptional insights into the CD8(+) T cell response to infection and  
284 memory T cell formation. *Nat. Immunol.* **14**, 404-412 (2013).

17. A. Souabni, C. Cobaleda, M. Schebesta, M. Busslinger, Pax5 promotes B lymphopoiesis and blocks T cell development by repressing Notch1. *Immunity* **17**, 781-793 (2002).
18. B. Bartholdy *et al.*, The Ets factor Spi-B is a direct critical target of the coactivator OBF-1. *Proc. Natl. Acad. Sci. U. S. A.* **103**, 11665-11670 (2006).
19. A. Kallies, A. Xin, G. T. Belz, S. L. Nutt, Blimp-1 transcription factor is required for the differentiation of effector CD8(+) T cells and memory responses. *Immunity* **31**, 283-295 (2009).
20. M. J. Richer, M. L. Lang, N. S. Butler, T Cell Fates Zipped Up: How the Bach2 Basic Leucine Zipper Transcriptional Repressor Directs T Cell Differentiation and Function. *J. Immunol.* **197**, 1009-1015 (2016).
21. D. Agac, L. D. Estrada, R. Maples, L. V. Hooper, J. D. Farrar, The beta2-adrenergic receptor controls inflammation by driving rapid IL-10 secretion. *Brain. Behav. Immun.* **74**, 176-185 (2018).
22. K. C. Verbist *et al.*, Metabolic maintenance of cell asymmetry following division in activated T lymphocytes. *Nature* **532**, 389-393 (2016).
23. J. T. Chang *et al.*, Asymmetric T lymphocyte division in the initiation of adaptive immune responses. *Science* **315**, 1687-1691 (2007).
24. J. B. Spangler *et al.*, Antibodies to Interleukin-2 Elicit Selective T Cell Subset Potentiation through Distinct Conformational Mechanisms. *Immunity* **42**, 815-825 (2015).
25. K. Mitra, A. R. Carvunis, S. K. Ramesh, T. Ideker, Integrative approaches for finding modular structure in biological networks. *Nat. Rev. Genet.* **14**, 719-732 (2013).
26. T. Ideker, N. J. Krogan, Differential network biology. *Mol. Syst. Biol.* **8**, 565 (2012).
27. A. Wise, Z. Bar-Joseph, cDREM: inferring dynamic combinatorial gene regulation. *J. Comput. Biol.* **22**, 324-333 (2015).
28. T. A. Doering *et al.*, Network analysis reveals centrally connected genes and pathways involved in CD8+ T cell exhaustion versus memory. *Immunity* **37**, 1130-1144 (2012).
29. C. D. Scharer, A. P. Bally, B. Gandham, J. M. Boss, Cutting Edge: Chromatin Accessibility Programs CD8 T Cell Memory. *J. Immunol.* **198**, 2238-2243 (2017).
30. L. D. Estrada, D. Ağaç, J. D. Farrar, Sympathetic neural signaling via the  $\beta$ 2-adrenergic receptor suppresses T-cell receptor-mediated human and mouse CD8(+) T-cell effector function. *Eur. J. Immunol.* **46**, 1948-1958 (2016).
31. K. M. Grebe *et al.*, Sympathetic nervous system control of anti-influenza CD8+ T cell responses. *Proc. Natl. Acad. Sci. U. S. A.* **106**, 5300-5305 (2009).
32. A. Nakai, Y. Hayano, F. Furuta, M. Noda, K. Suzuki, Control of lymphocyte egress from lymph nodes through beta2-adrenergic receptors. *J. Exp. Med.* **211**, 2583-2598 (2014).
33. K. Suzuki, Y. Hayano, A. Nakai, F. Furuta, M. Noda, Adrenergic control of the adaptive immune response by diurnal lymphocyte recirculation through lymph nodes. *J. Exp. Med.* **213**, 2567-2574 (2016).
34. D. Lo *et al.*, Peripheral tolerance to an islet cell-specific hemagglutinin transgene affects both CD4+ and CD8+ T cells. *Eur J Immunol* **22**, 1013-1022 (1992).
35. D. K. Rohrer, A. Chruscinski, E. H. Schauble, D. Bernstein, B. K. Kobilka, Cardiovascular and metabolic alterations in mice lacking both beta1- and beta2-adrenergic receptors. *J Biol Chem* **274**, 16701-16708 (1999).

36. J. W. McAlees, V. M. Sanders, Hematopoietic protein tyrosine phosphatase mediates  
330 beta2-adrenergic receptor-induced regulation of p38 mitogen-activated protein kinase in  
B lymphocytes. *Mol Cell Biol* **29**, 675-686 (2009).
- 332 37. R. K. Patel, M. Jain, NGS QC Toolkit: a toolkit for quality control of next generation  
sequencing data. *PLoS One* **7**, e30619 (2012).
- 334 38. D. Kim, B. Langmead, S. L. Salzberg, HISAT: a fast spliced aligner with low memory  
requirements. *Nat. Methods* **12**, 357-360 (2015).
- 336 39. Y. Liao, G. K. Smyth, W. Shi, featureCounts: an efficient general purpose program for  
assigning sequence reads to genomic features. *Bioinformatics* **30**, 923-930 (2014).
- 338 40. J. Xia, D. S. Wishart, Using MetaboAnalyst 3.0 for Comprehensive Metabolomics Data  
Analysis. *Curr Protoc Bioinformatics* **55**, 14 10 11-14 10 91 (2016).

340

342 **Acknowledgments:**

Primary RNASeq data were deposited in the GEO database under accession number GSE102478  
344 (“Timeseries analysis of gene expression in *Adrb2*<sup>+/+</sup> and *Adrb2*<sup>-/-</sup> C4-transgenic CD8<sup>+</sup> T cells  
responding to Vesicular Stomatitis Virus expressing hemagglutinin from influenza A PR/8”).

346 The authors thank Dr. Virginia Sanders (Ohio State University) for sharing the BALB/c x  
*Adrb2*<sup>-/-</sup> animals. We thank Ms. Angela Mobley and the UT Southwestern flow cytometry  
348 facility for excellent cell sorting assistance. We are grateful to Drs. Lora Hooper, Regina Rowe,  
and Michelle Gill for their advice on this project and for reviewing the manuscript.

350 This work was supported by NIH grants AI056222, AI125545, and AI143248 (JDF).  
LDE was supported by NIH training grant AI005284. DA was supported by a Careers in  
352 Immunology fellowship from the American Association of Immunologists.

Author contributions: LDE designed and performed experiments and wrote the paper;  
354 DA performed experiments and edited the paper; AW performed SMARTS analysis and wrote  
the paper; MCC designed bioinformatic approach; and JDF designed the study, performed data  
356 analysis, and wrote the paper.

358

360

## Materials and Methods

362 *Animals*

BALB/cJ, Clone4-Tg (C14) (34), and *Adrb2*<sup>-/-</sup> (35) mice were housed in specific pathogen-free conditions at the University of Texas Southwestern Medical Center Animal Research Center facilities. *Adrb2*<sup>-/-</sup> mice bred onto the BALB/c background (36) were a kind gift from Dr. Virginia Sanders (Ohio State University), and C14 mice were purchased from Jax mice (Jackson laboratory). All experiments involving mice in this study were approved by the Institutional Animal Care and Use Committee of the University of Texas Southwestern Medical Center.

### *Adoptive T cell transfer and VSV-HA infection*

370 Recombinant VSV-HA expressing hemagglutinin from Influenza A PR/8 (10) was a kind gift from Dr. Elizabeth Ramsburg. CD8<sup>+</sup> T cells were isolated from spleen and lymph nodes (axillary, brachial, inguinal, and superficial cervical) of WT and *Adrb2*<sup>-/-</sup> C14 mice (7-12 weeks old) with a negative isolation kit according to the manufacturer's instructions (Invitrogen #11417D). Donor T cells were derived from CD90.1 congenic animals in order to track their frequency in CD90.2 hosts. For co-transfer experiments, 2000 cells of a 1:1 mix of each genotype (1000 cells each) were intravenously (i.v.) injected into naive BALB/cJ mice in 100 μLs of sterile saline. One day later, each mouse was infected i.v. with 1e<sup>6</sup> plaque-forming units (PFU) of VSV-HA. Mice were then sacrificed at the time points indicated post infection, and the frequency of transferred cells was monitored by flow cytometry by staining for CD90.1 and CD90.2.

### *In vitro T cell assays*

382 *In vitro* cytokine assays were performed as previously described (6). Single cell suspensions from spleen and lymph nodes (axillary, brachial, inguinal and superficial cervical) were prepared separately and incubated at 2x10<sup>6</sup>/mL in the presence or absence of the CD8<sup>+</sup> T cell-specific HA peptide (IYSTVASSL, 50 nM) for 21-24 hrs. For *in vitro* cell division assays, cells were pre-labeled with CFSE prior to activation and allowed to divide in culture for 72 hrs. Cells were stained for CD90.1 and CD25 and analyzed by FACS.

388 *RNASeq Analysis*

WT and *Adrb2*<sup>-/-</sup> C4-Tg T cells were co-transferred to BALB/cJ recipients followed by infection  
390 with VSV-HA, as described above. RNA was isolated from cells prior to transfer and from  
CD90.1/2 FACS-purified cells isolated from cohorts of infected animals at incremental days  
392 post-infection. WT and *Adrb2*<sup>-/-</sup> cells were distinguished based on single or co-expression of  
CD90.1 and CD90.2. Barcoded libraries were prepared from purified mRNA (New England  
394 Biolabs, #E7530S, #E7490S, #E7335S, and Axygen #MAG-PCR-CL-5) and sequenced on an  
Illumina HISEQ 2500.

396 Quality assessment of the RNASeq data was performed using NGS-QC-Toolkit (37).  
Reads with more than 30% of nucleotides with Phred quality scores less than 20 were removed  
398 from further analysis. Quality filtered reads were then aligned to the mouse reference genome  
GRCm38 (mm10) using the HISAT (v 2.0.1) aligner (38) using default setting except for –  
400 library-type = fr-firststrand. Aligned reads were counted using featureCount (v1.4.6) (39) per  
gene ID. Differential gene expression analysis was performed using the R package edgeR (14) (v  
402 3.8.6). For each comparison, genes were required to have 1 read in at least 1 sample to be  
considered as expressed. They were used for normalization factor calculation. Gene differential  
404 expression analysis was performed using GLM approach following edgeR analysis. Cutoff  
values of fold change greater than 2 and FDR less than 0.01 were then used to select for  
406 differentially expressed genes between sample group comparisons. Normalized gene FPKM  
values were averaged within groups for heatmap generation. MetaboAnalyst3.0 (40) was used to  
408 perform R-based principle component analysis (PCA) and integrated pathway analysis using the  
KEGG metabolic pathway database.

410 To perform the SMARTS analysis, we developed a new version of SMARTS,  
'Supervised SMARTS' that can use known class labels for building models. SMARTS uses an  
412 Input/Output Hidden Markov Model (IOHMM) approach to model the regulation of genes over  
time. Each SMARTS model reconstructs the regulatory activity of an ensemble of individual  
414 time series. SMARTS requires as input a mapping between transcriptional regulators and their  
gene targets. We generated such a mapping using the regulatory behavior identified in Best et al.  
416 in their supplementary table 12 (16). We used SMARTS to build two models, one from the three  
WT cells time series and the other from the three *Adrb2*<sup>-/-</sup> cells time series. The SMARTS  
418 analysis covered all 5 time points, from 0-12 days post infection. We further used SMARTS to  
identify putative differentially active transcription factors between the two models. In brief, we



420 identify transcription factors whose regulated genes can only have their gene expression patterns  
explained by the proper model. This criterion is evaluated using a permutation test to determine  
422 statistical significance. See Wise and Bar-Joseph, 2013 section 2.4 for complete details (15).

*Statistical analyses*

424 Three different statistical tests were performed using the GraphPad Prism software. For simple  
pairwise comparisons, a Student's two-tailed t-test was used. Otherwise, a one-way or two-way  
426 ANOVA was used followed by a Bonferroni posttest for pairwise comparisons within the  
groups, as indicated in the figure legends. Differences were considered significant at  $p \leq 0.05$ .

## 428 **Figure Legends**

430 **Figure 1. The ADRB2 regulates transcriptional programs during early T cell priming.** (A)  
WT (CD90.1/1) and *Adrb2*<sup>-/-</sup> (CD90.1/2) C4-Tg T cells were co-transferred (1:1, 1000 cells  
432 each) to BALB/cJ (CD90.2/2) recipients, which were infected with VSV-HA. RNA was isolated  
for RNASeq analysis from purified cells on day 0 and from infected hosts on days 4, 5, 7, and 12  
434 post-infection. (B) Expansion of transferred cells in pooled spleen and lymph node was  
quantified by flow cytometry by measuring the percentage of WT and *Adrb2*<sup>-/-</sup> cells within the  
436 total proportion of congenic CD90.1<sup>+</sup> cells (\*\*\*\* p < 0.0001 and ## p < 0.01 by two-way  
ANOVA). (C) EdgeR analysis identified all genes differentially expressed at any timepoint  
438 between WT and *Adrb2*<sup>-/-</sup> cells. Gene expression values were used to perform 1-way hierarchical  
clustering, and data are displayed as a heat map. (D) Principal component analysis of  
440 differentially expressed genes between WT and *Adrb2*<sup>-/-</sup> cells displayed as a function of each  
timepoint post-infection (PC1 vs PC2, top panel; PC3 vs PC4, bottom panel).

442

**Figure 2. The ADRB2 selectively regulates transcriptional pathways involved in diverse**  
444 **immune functions.** Differentially expressed genes between WT and *Adrb2*<sup>-/-</sup> cells at each time  
point of infection are displayed in volcano plots, and select genes contributing to major KEGG  
446 pathways are denoted within the plots. (B) KEGG pathway analysis was performed with the  
differentially expressed genes at each time point. The top five pathways are displayed.

448

**Figure 3. ADRB2 signaling coordinates temporal waves of gene expression.** (A) SMARTS  
450 analysis at each timepoint compared to the day 0 pre-transfer condition. Each path corresponds  
to clusters of genes sharing common magnitude, direction of expression and regulatory factors.  
452 Red nodes in the model represent splits in expression between groups of genes. TRs predicted to  
regulate each split path are listed above and below their corresponding paths, and TRs in red  
454 were predicted by SMARTS to be involved in differential gene regulation between WT and  
*Adrb2*<sup>-/-</sup> cells. WT paths F (cyan) and G (magenta), and *Adrb2*<sup>-/-</sup> path E (green) contained genes  
456 and regulators which were significantly altered between the two models; they were subjected to

458 further analyses (in B and C). **(B)** Venn analysis of constituent genes within WT paths F and G  
460 and *Adrb2*<sup>-/-</sup> path E. Values represent the numbers of genes within each unique or shared  
segment. **(C)** Integrated KEGG pathway analysis of constituent genes of WT paths F and G and  
460 *Adrb2*<sup>-/-</sup> path E. The top 5 pathways from each path are listed.

462 **Figure 4. Select transcription factor expression regulated by the ADRB2.** Normalized FPKM  
values for specific transcription factors are displayed for WT (open circles) and *Adrb2*<sup>-/-</sup> (red  
464 squares) CD8<sup>+</sup> T cells isolated at the indicated time points of infection. (A) *Tbx21*, (B) *Eomes*,  
(C) *Prdm1*, (D) *Pax5*, (E) *Spib*, (F) *Mef2c*, (G) *Mafb*, (H) *Bach2*.

466 **Supplementary Materials:**

**Supplementary Figure 1: The *Adrb2* controls expression of IL-2 and the IL-2R $\alpha$ .**

468 **Supplementary Tables S1-S8:**

470 **S1 – Table of all differentially expressed genes between WT and *Adrb2*<sup>-/-</sup> cells at all timepoints.**

472 **S2 – KEGG analysis of differentially expressed genes between WT and *Adrb2*<sup>-/-</sup> cells at each timepoint.**

**S3 – Tables of genes in each path of the *Adrb2*<sup>+/+</sup> SMARTS model.**

474 **S4 – Tables of genes in each path of the *Adrb2*<sup>-/-</sup> SMARTS model.**

476 **S5 – Tables of transcription factor predictions for each path of the *Adrb2*<sup>+/+</sup> SMARTS model.**

478 **S6 – Tables of transcription factor predictions for each path of the *Adrb2*<sup>-/-</sup> SMARTS model.**

480 **S7 – Table of transcriptional regulator (TR) prediction differences between *Adrb2*<sup>+/+</sup> and *Adrb2*<sup>-/-</sup> models.**

**S8 – Table of genes included in unique and shared paths by Venn analysis.**

Figure 1

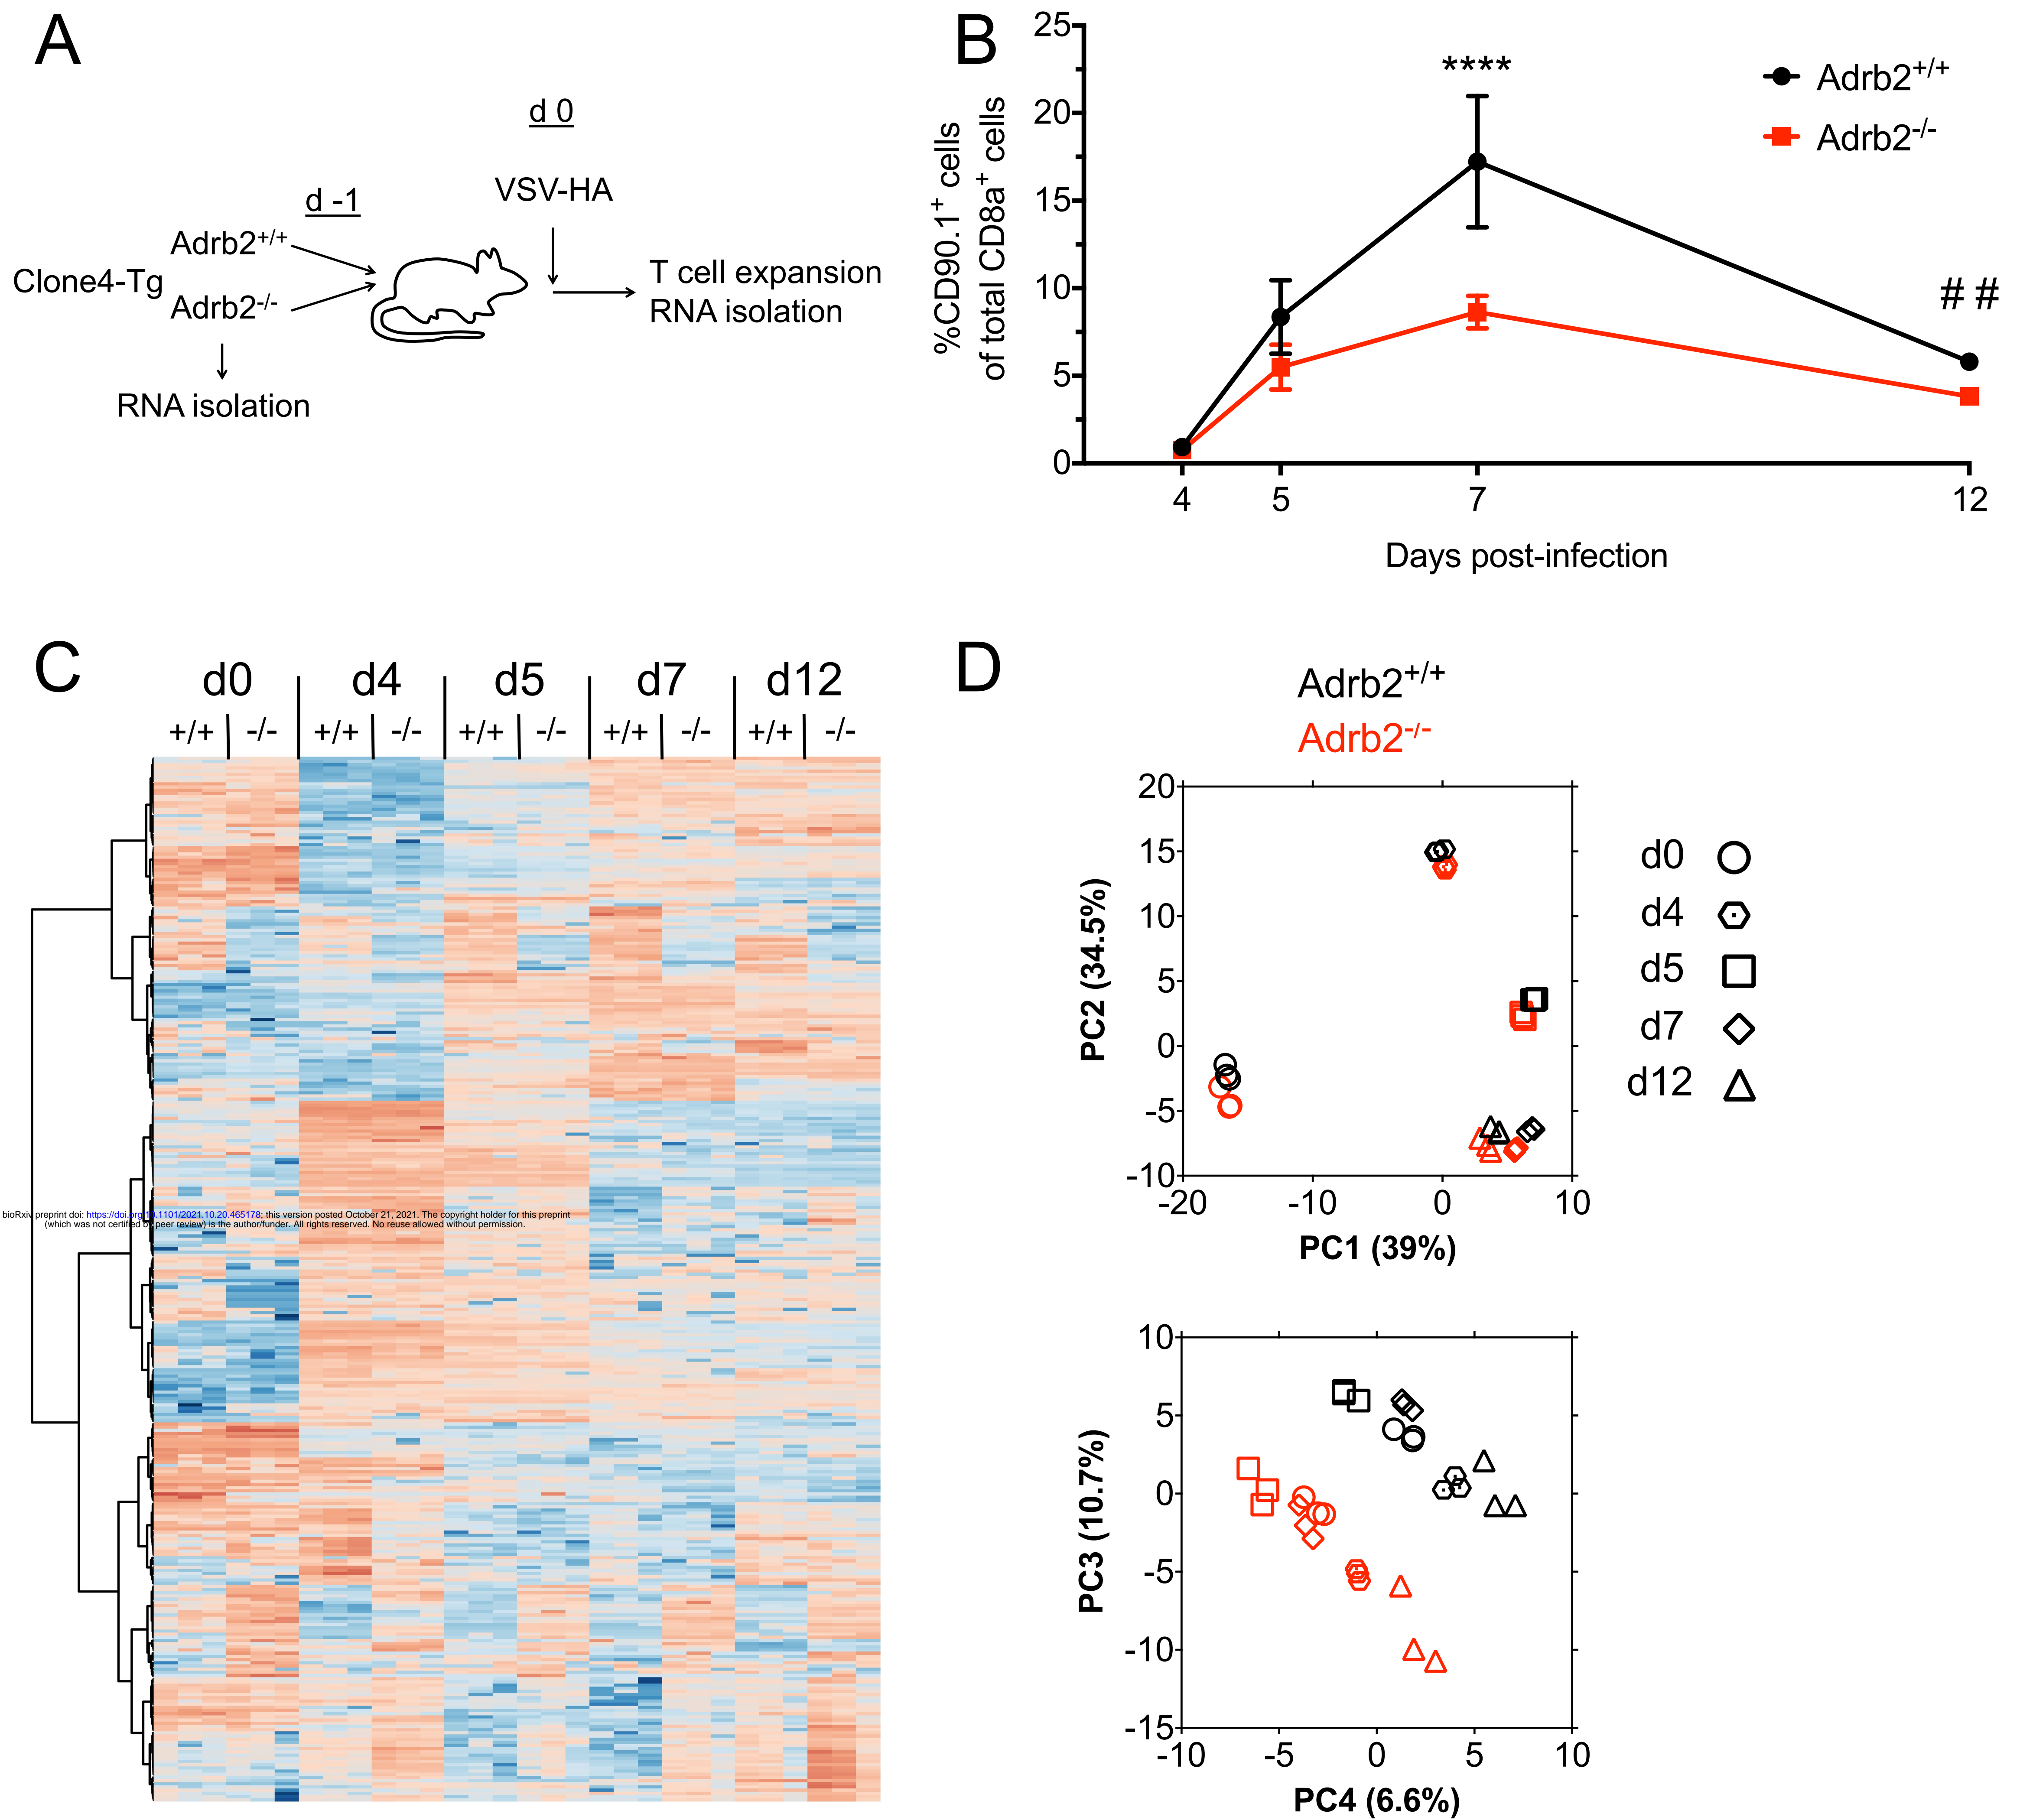

Figure 2

A

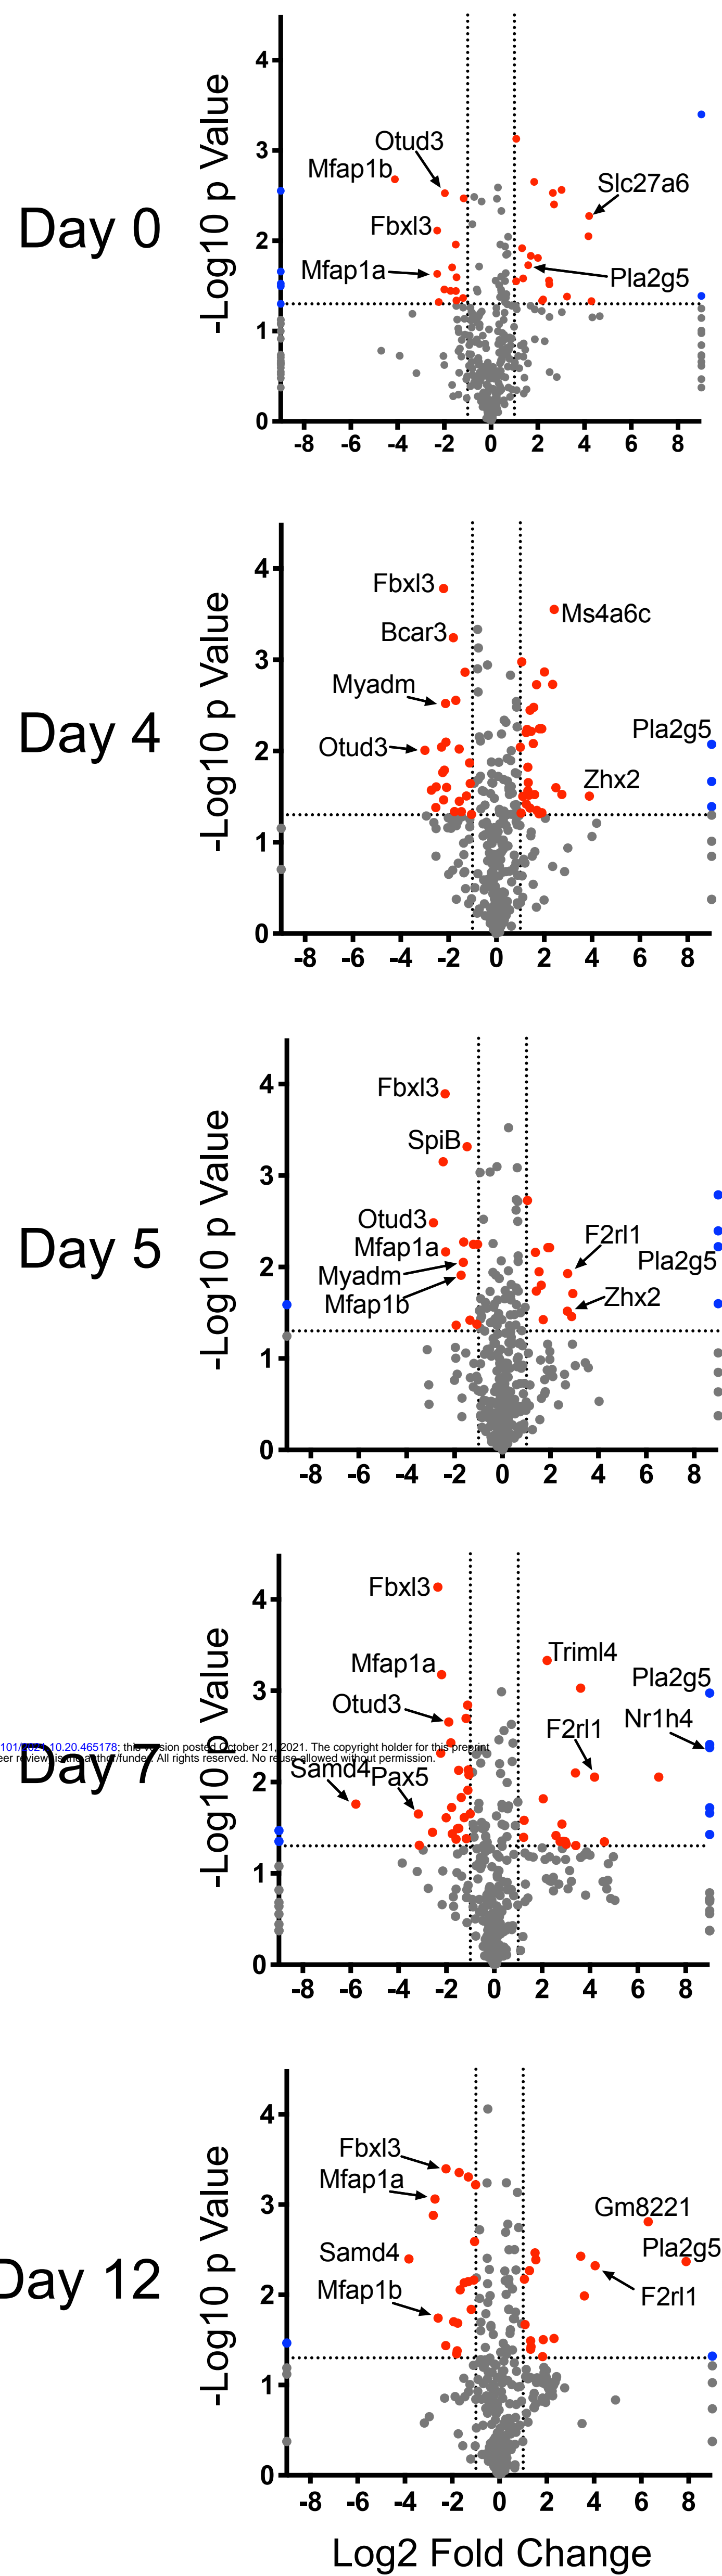

B

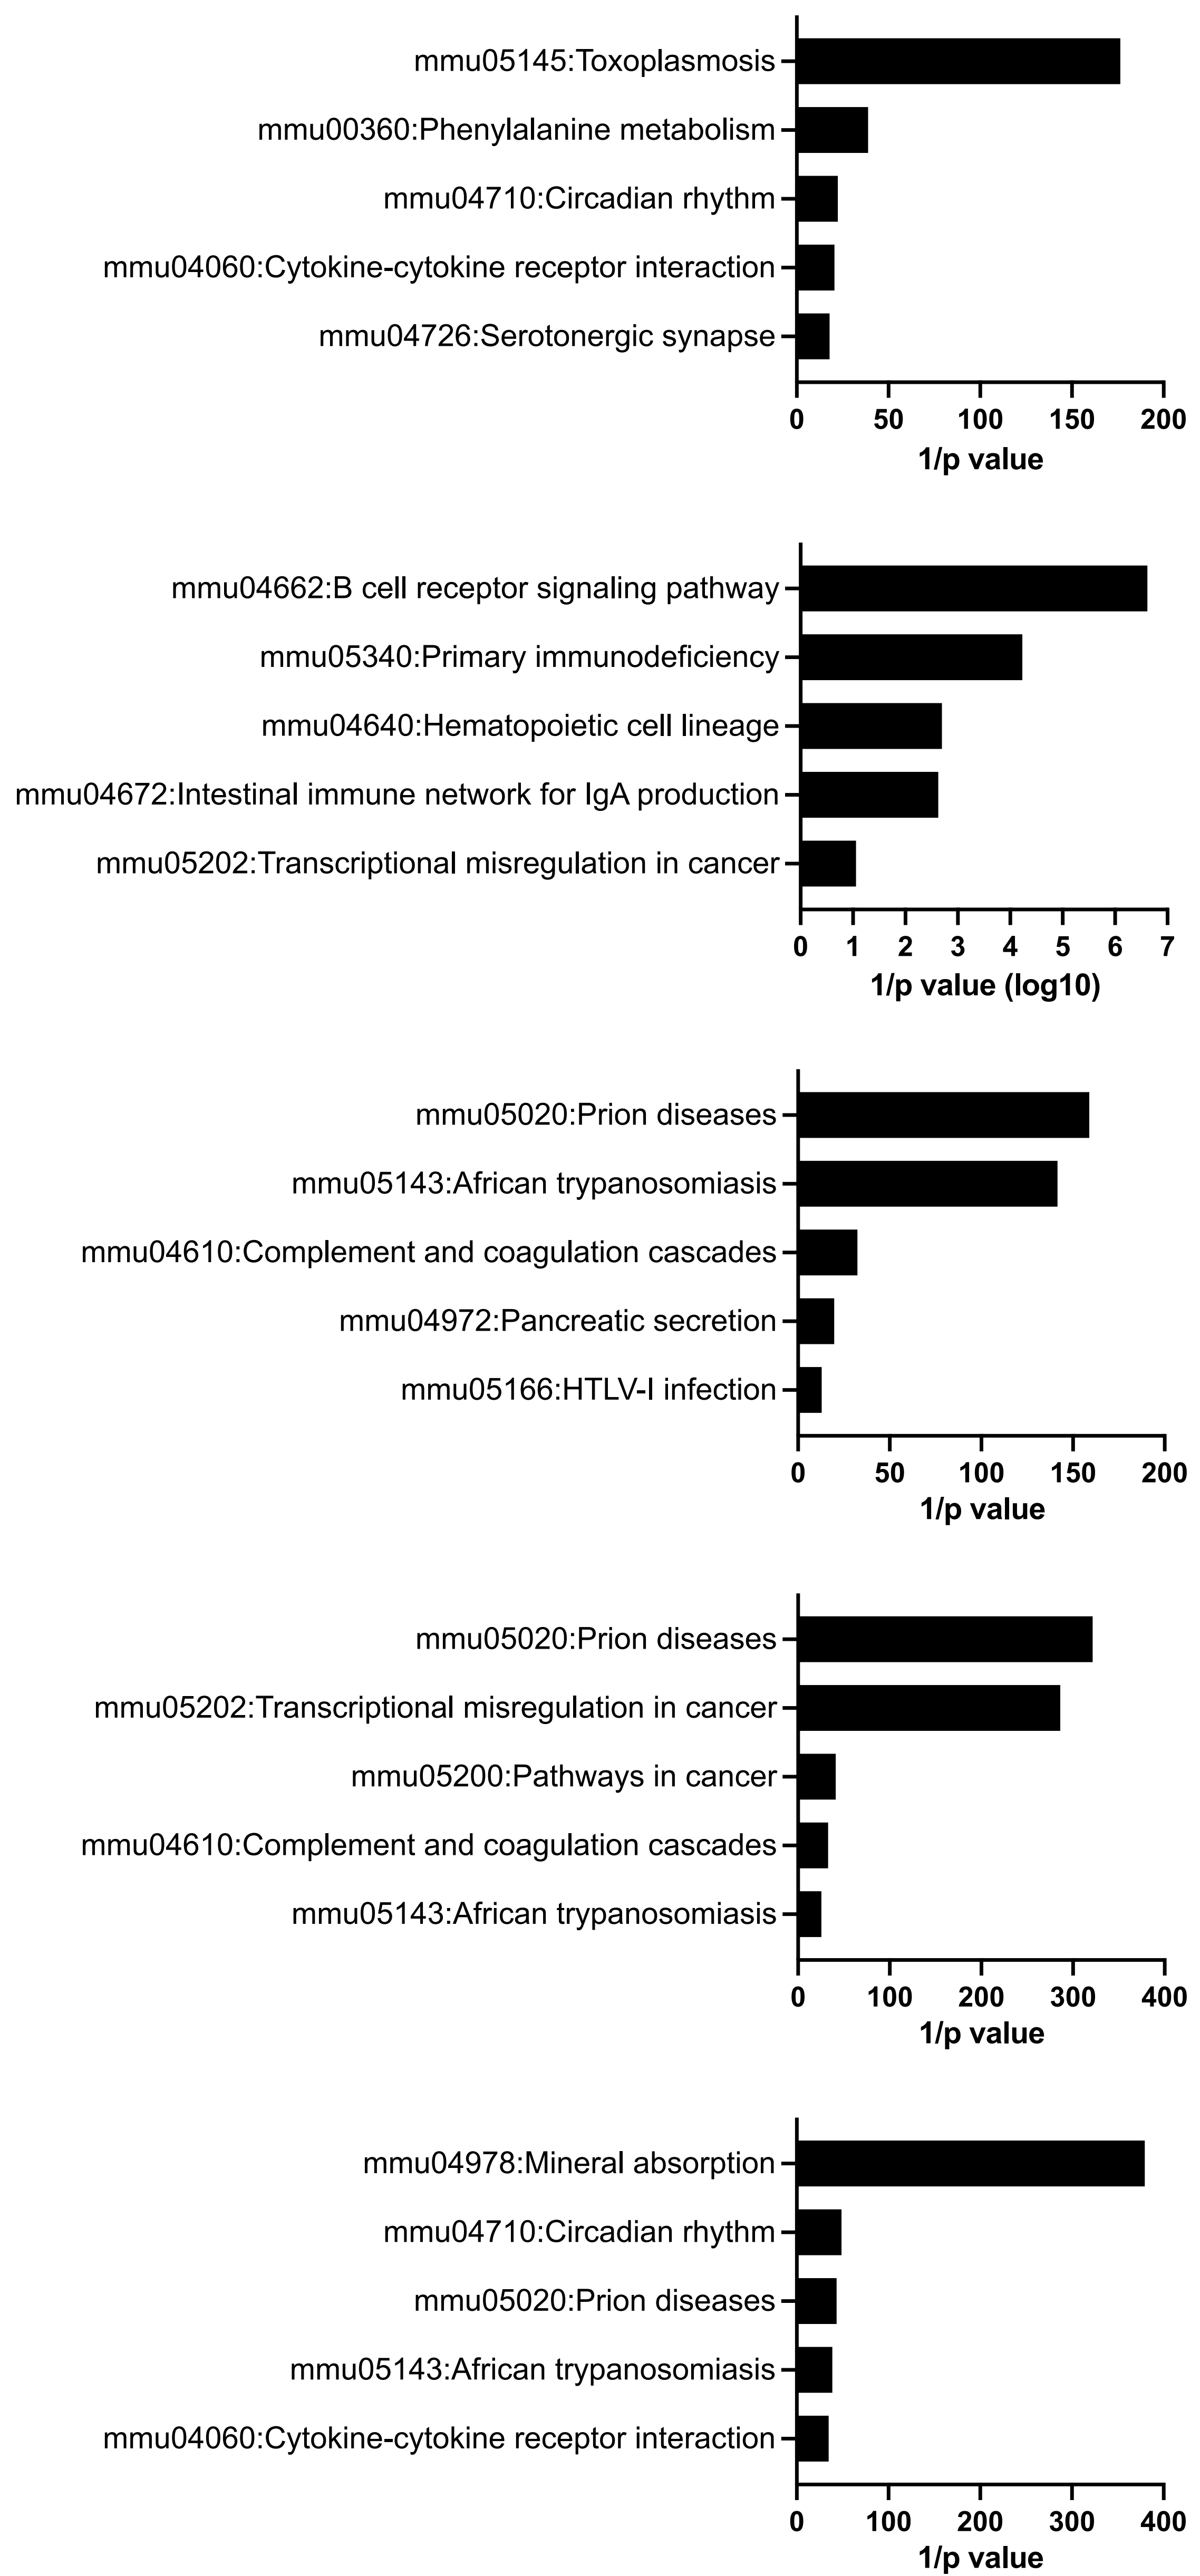

# Figure 3

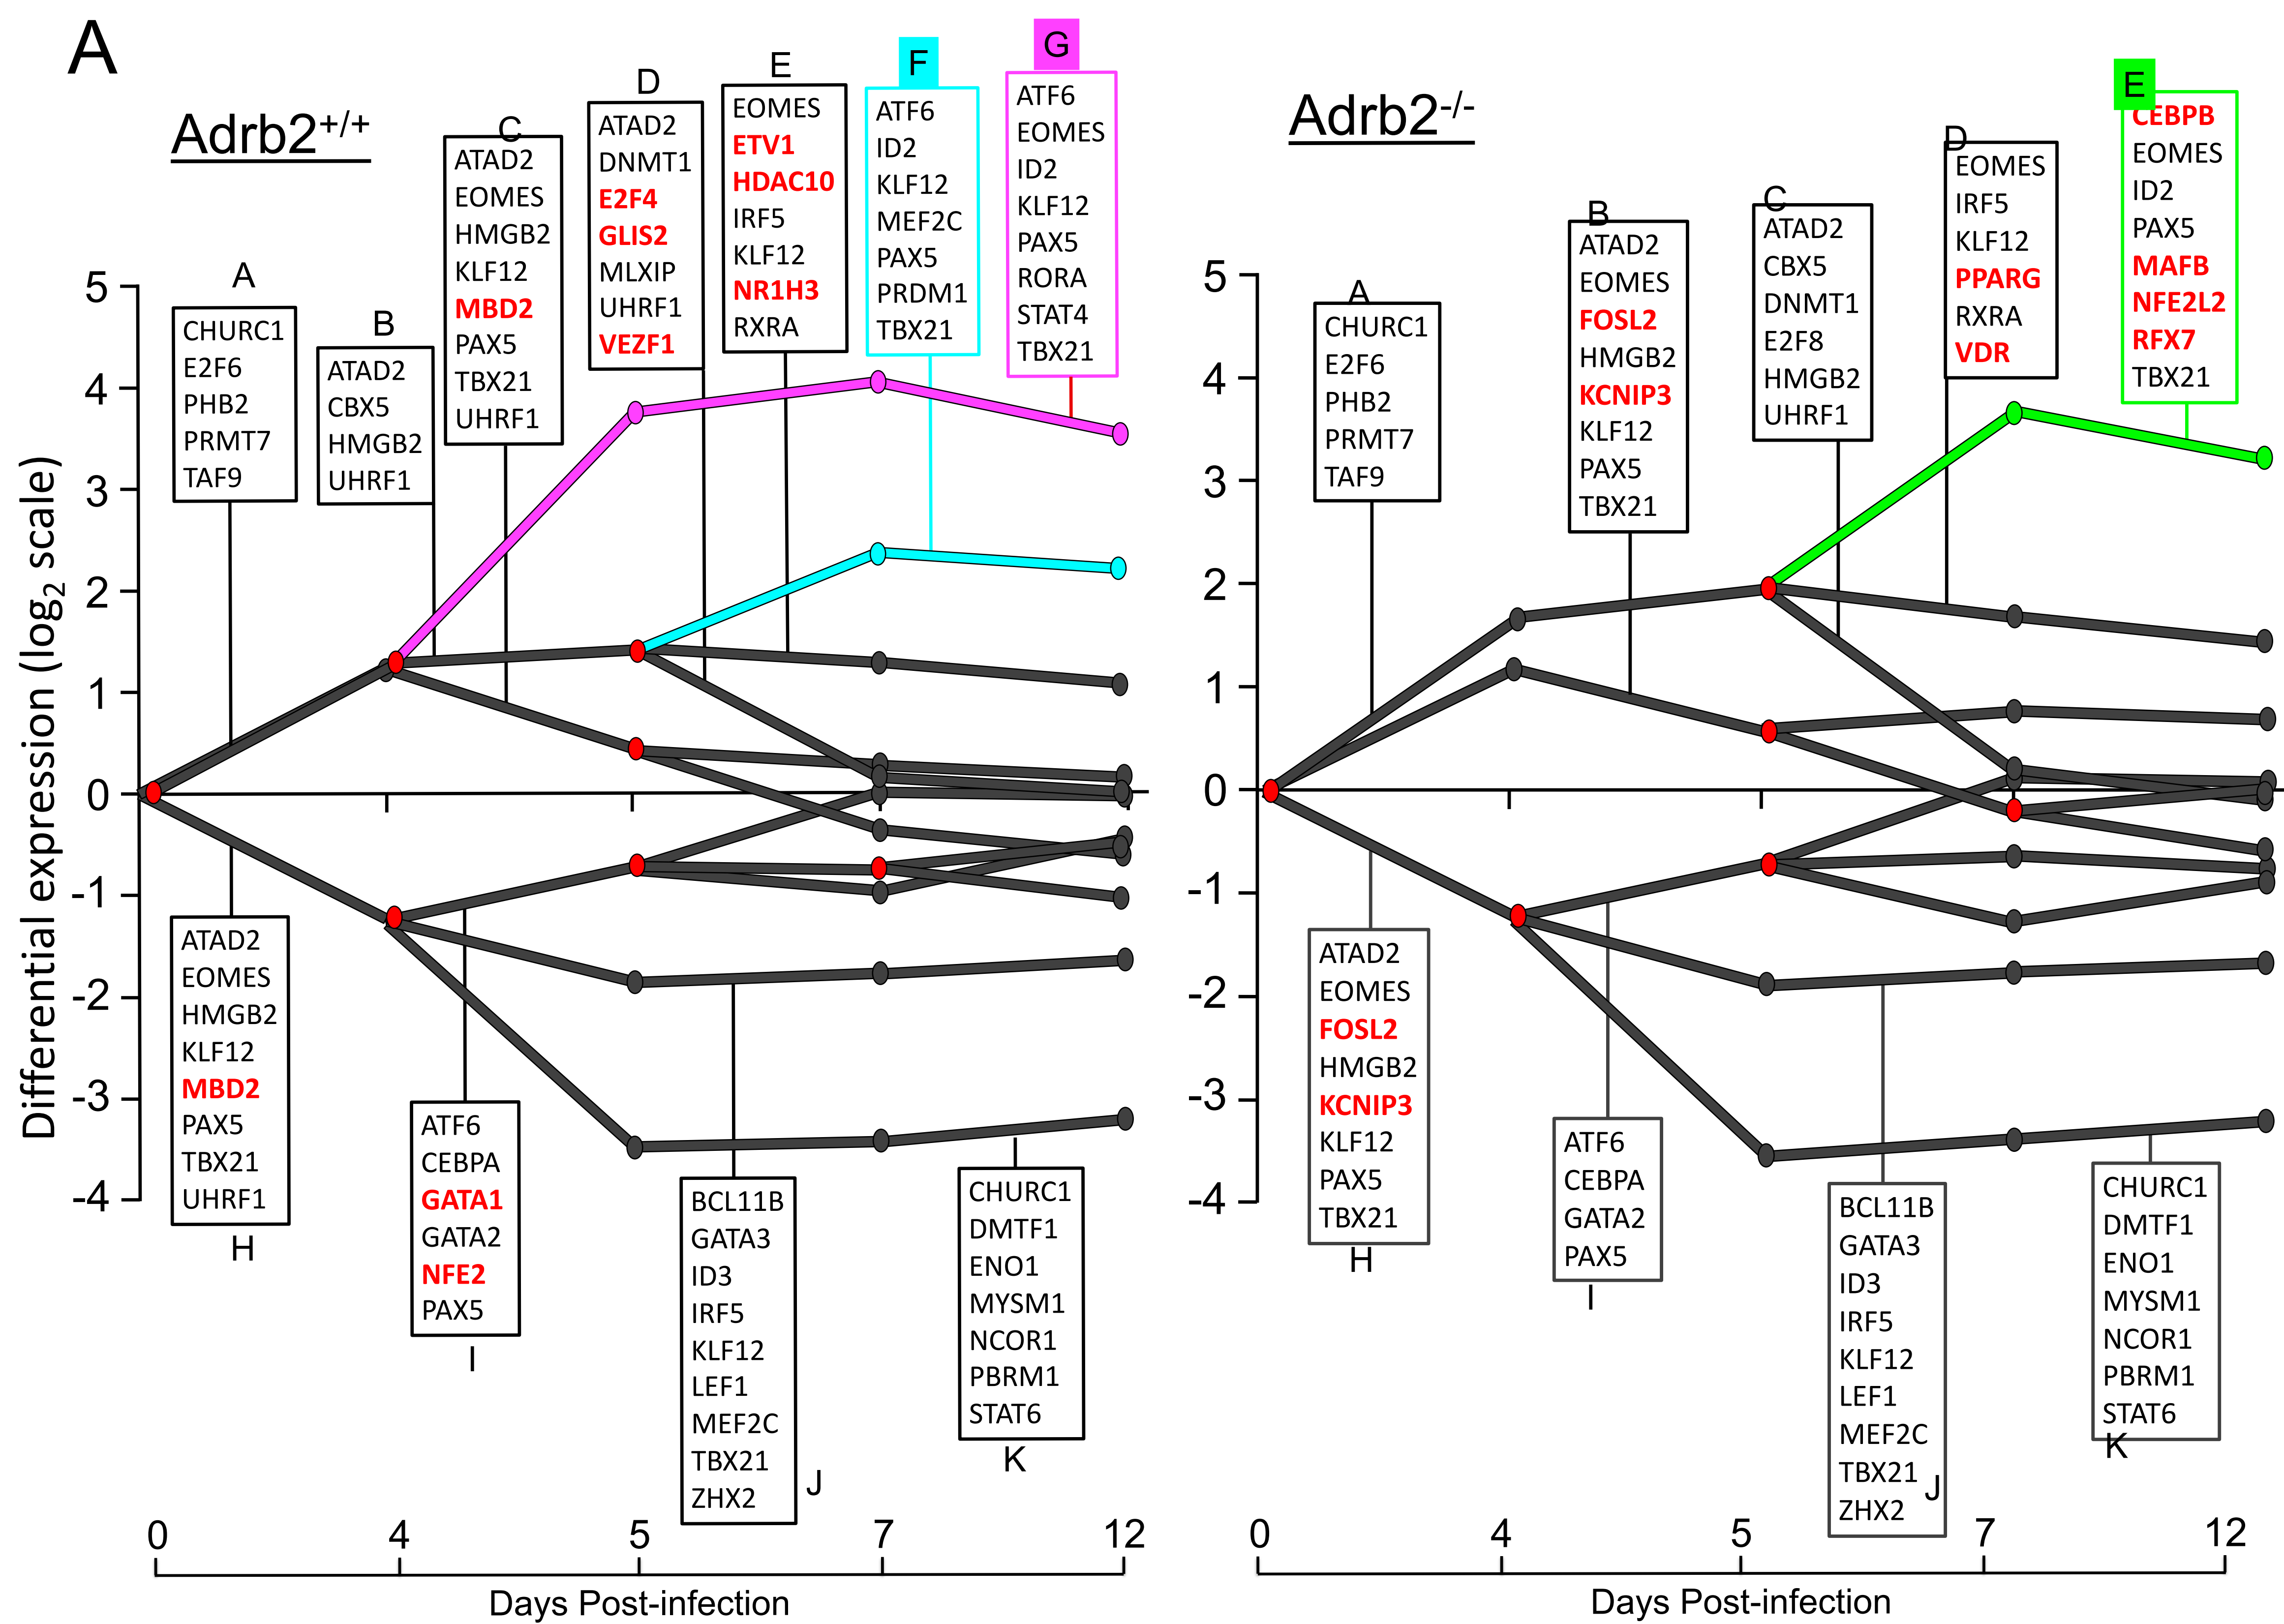

bioRxiv preprint doi: <https://doi.org/10.1101/2021.10.20.465178>; this version posted October 21, 2021. The copyright holder for this preprint (which was not certified by peer review) is the author/funder. All rights reserved. No reuse allowed without permission.

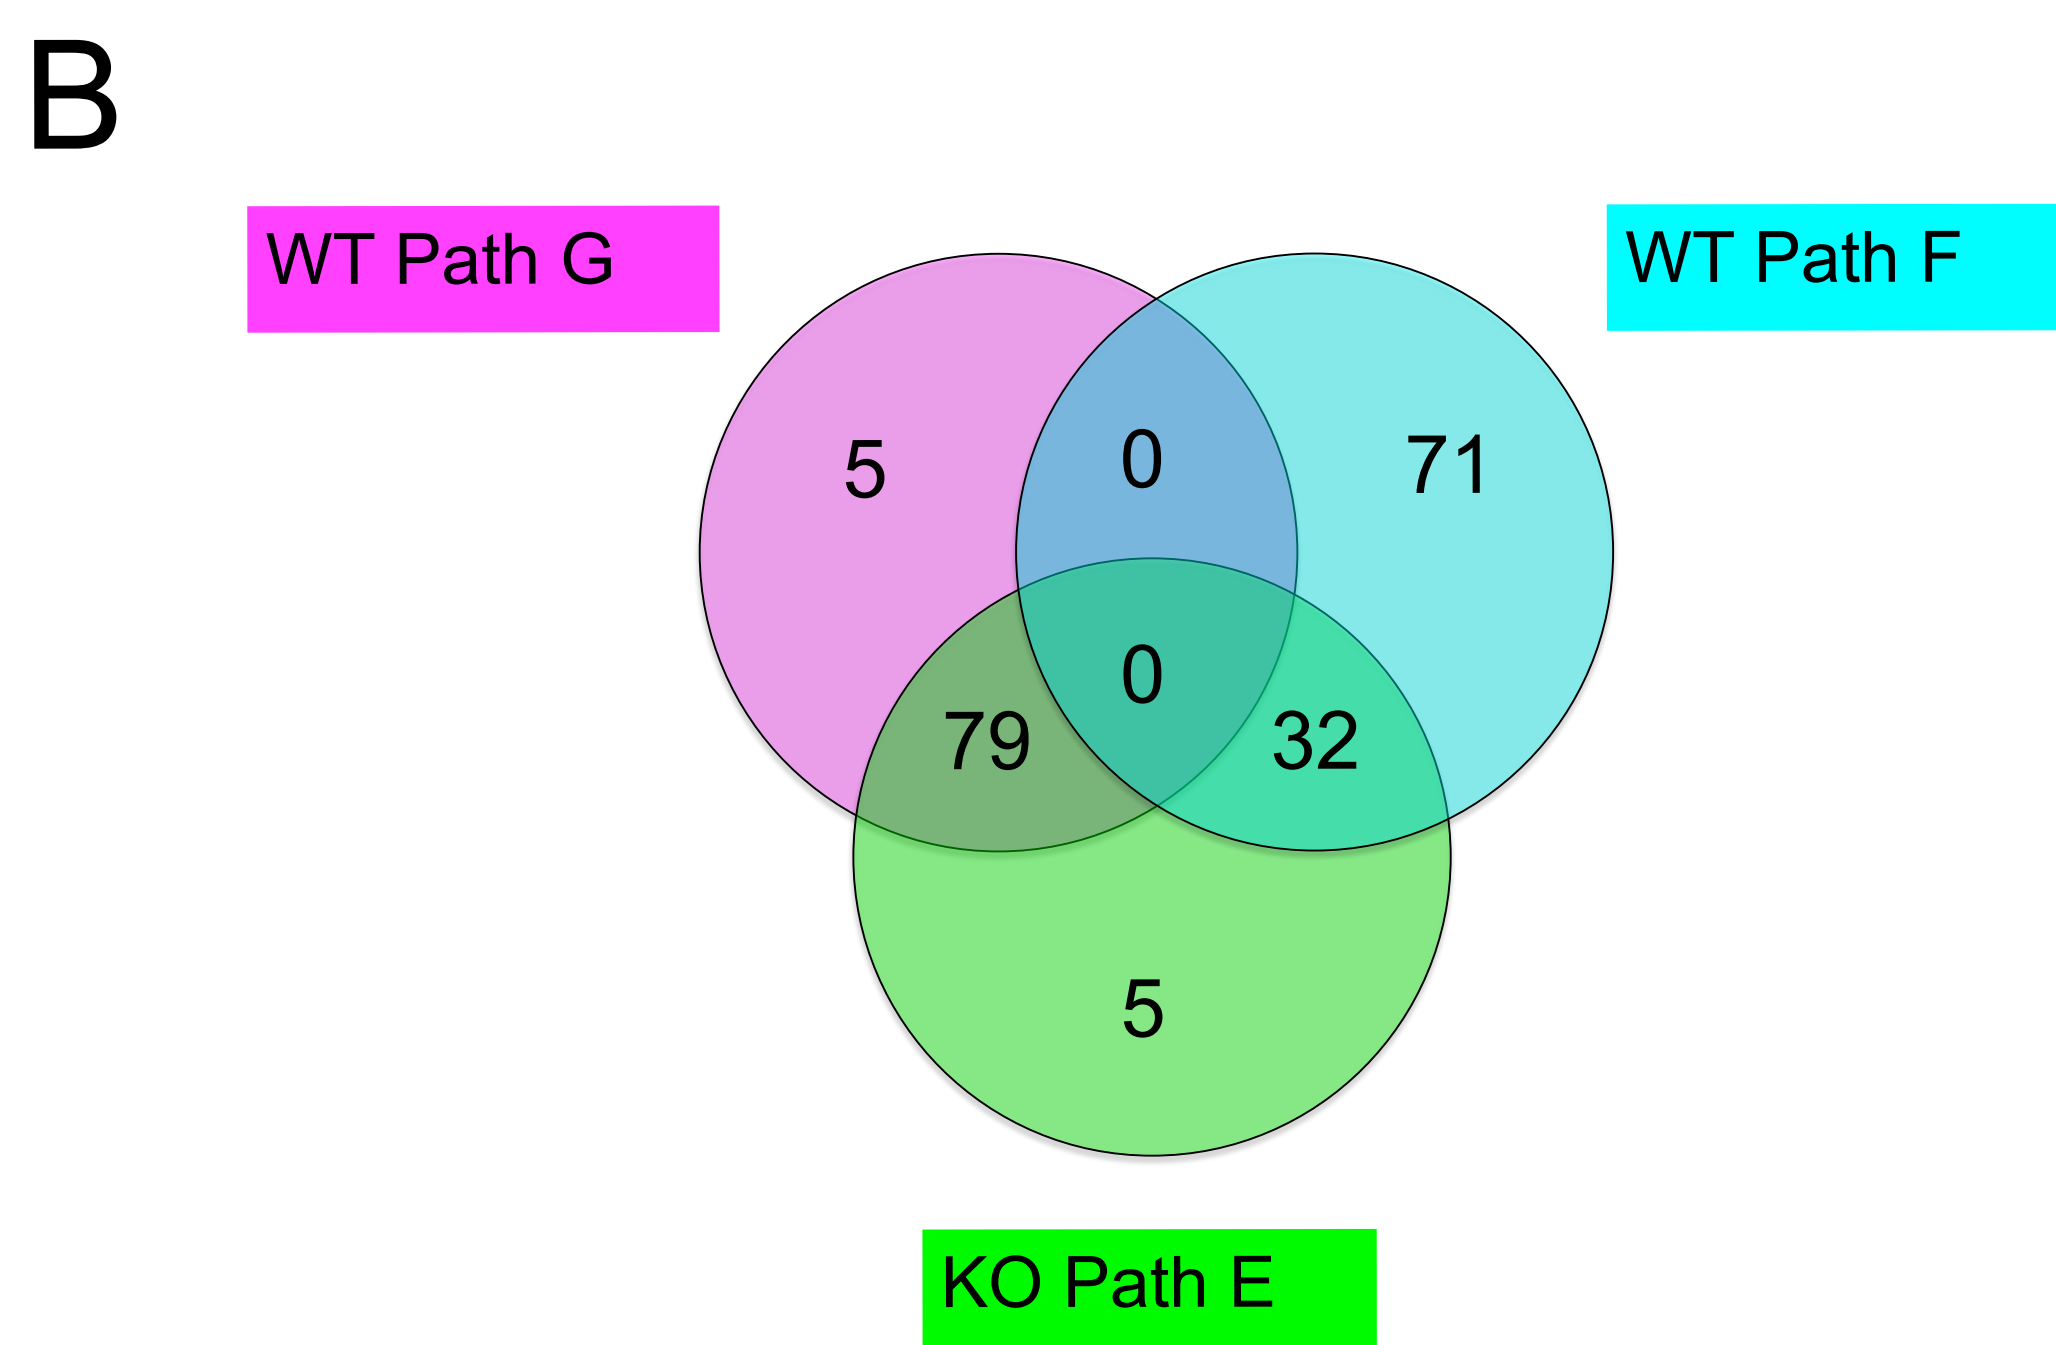

**C**

| KEGG Pathway                              | p value    |
|-------------------------------------------|------------|
| Cytokine-cytokine receptor interaction    | 9.60E-08   |
| Natural killer cell mediated cytotoxicity | 0.00010776 |
| Chemokine signaling pathway               | 0.00012999 |
| Antigen processing and presentation       | 0.00067525 |
| Cell adhesion molecules (CAMs)            | 0.0015596  |

**WT Path G**

| KEGG Pathway                              | p value    |
|-------------------------------------------|------------|
| Cytokine-cytokine receptor interaction    | 3.54E-08   |
| Chemokine signaling pathway               | 2.51E-06   |
| Natural killer cell mediated cytotoxicity | 0.00057214 |
| Amoebiasis                                | 0.001531   |
| Antigen processing and presentation       | 0.0020715  |

**KO Path E**

| KEGG Pathway                                         | p value   |
|------------------------------------------------------|-----------|
| Cytokine-cytokine receptor interaction               | 0.0013019 |
| Glycosaminoglycan biosynthesis - chondroitin sulfate | 0.002177  |
| Systemic lupus erythematosus                         | 0.0046762 |
| Transcriptional misregulation in cancer              | 0.0046762 |
| MAPK signaling pathway                               | 0.013428  |

**WT Path F**

Figure 4

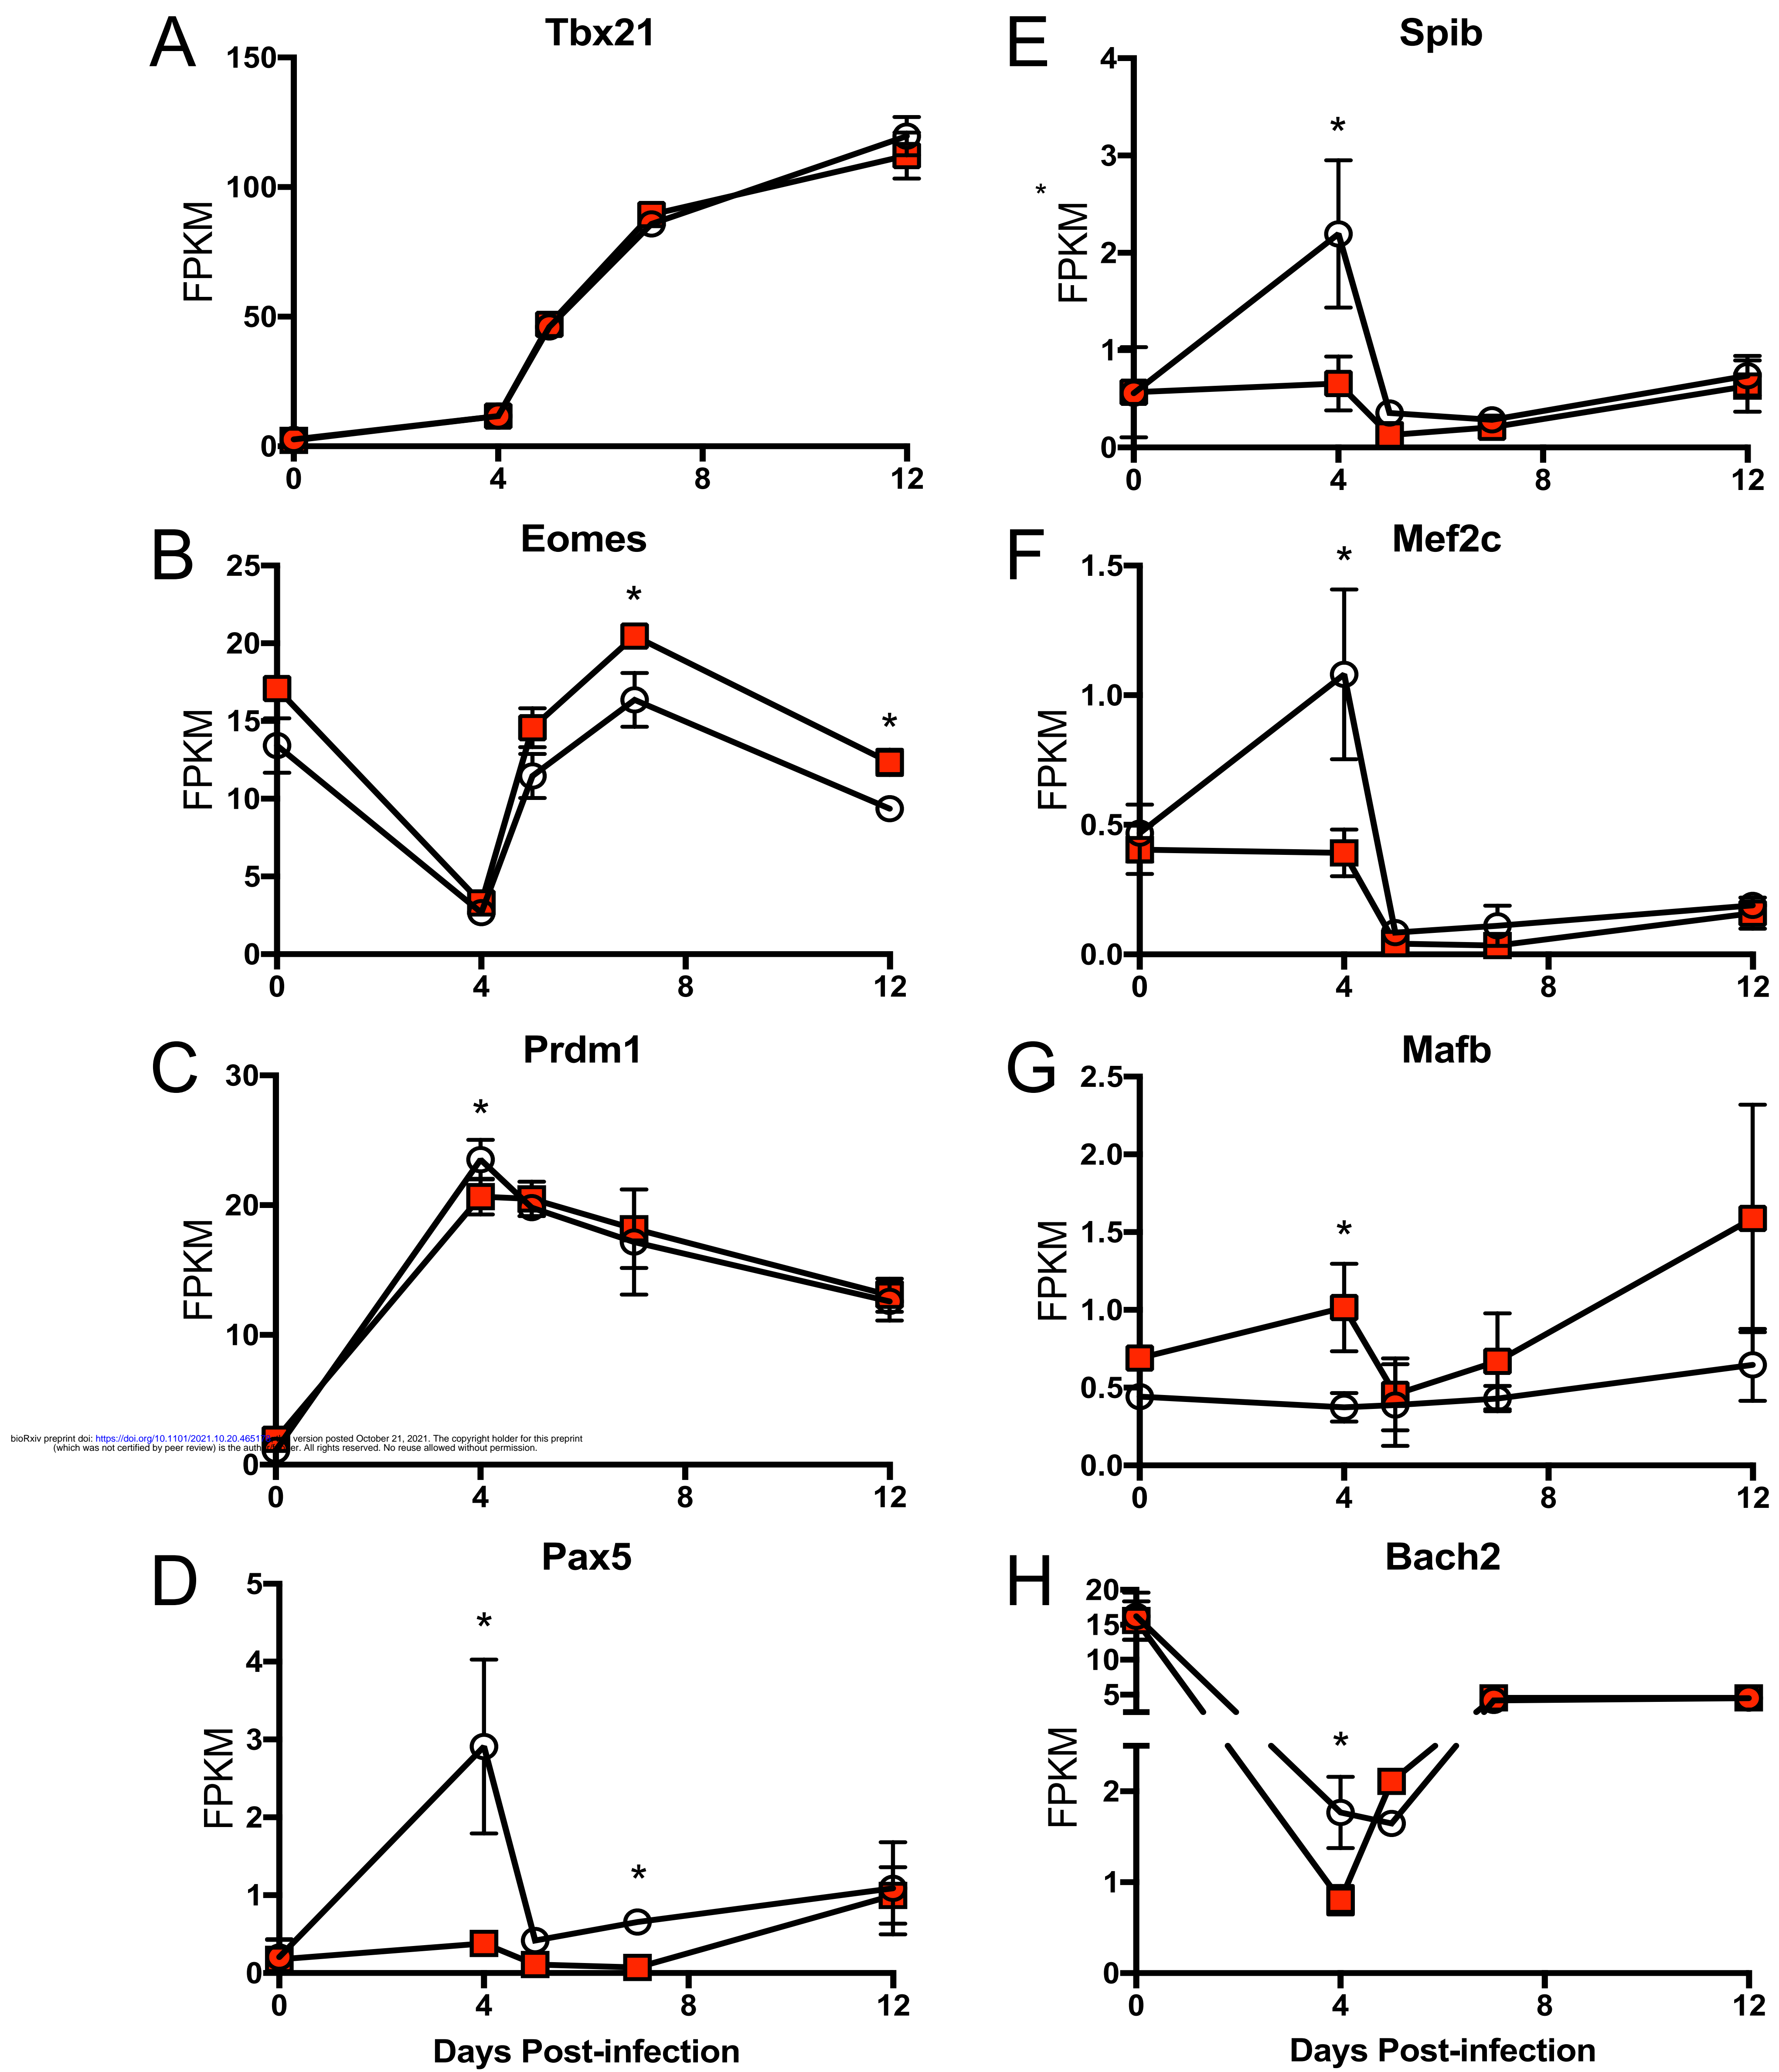

Source: http://biorxiv.org/content/10.1101/2021.10.20.465178v1.full.pdf
